# Supplementary material
Source: PubMed Central journal article supplement (PMC7334528)
Supplement: pnas.2001404117.sapp.pdf [file pnas.2001404117.sapp.pdf]

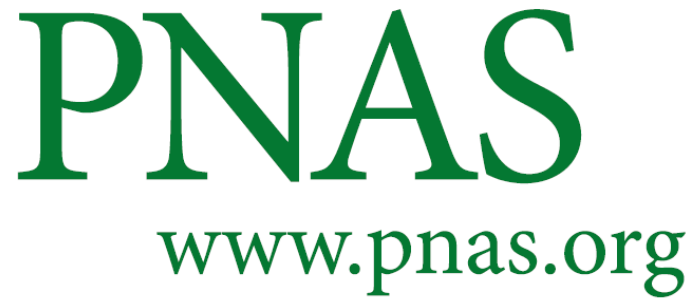

Supplementary Information for

**Label-free Hematology Analysis Using Deep-Ultraviolet Microscopy**

Ashkan Ojaghi<sup>1</sup>, Gabriel Carrazana<sup>1</sup>, Christina Caruso<sup>2</sup>, Asad Abbas<sup>1</sup>, David R. Myers<sup>1,2</sup>,  
Wilbur A. Lam<sup>1,2</sup>, Francisco E. Robles<sup>1\*</sup>

<sup>1</sup>Wallace H. Coulter Department of Biomedical Engineering, Georgia Institute of Technology and Emory University, Atlanta, GA.

<sup>2</sup>Aflac Cancer and Blood Disorders Center of Children's Healthcare of Atlanta and Department of Pediatrics, Emory University School of Medicine, Atlanta, GA.

\*Corresponding Author: Francisco E. Robles

Email: [robles@gatech.edu](mailto:robles@gatech.edu)

**This PDF file includes:**

Figures S1 to S5  
Table S1  
SI References

**Supplementary Information:**

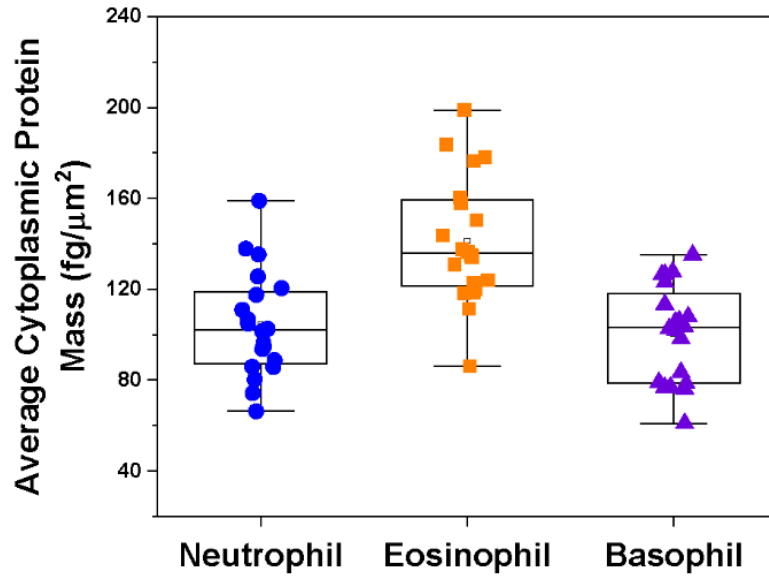

**Fig. S1.** The average cytoplasmic protein mass for different granulocyte subtypes.

|            |            |                 |            |            |
|------------|------------|-----------------|------------|------------|
| True Class | Basophil   | 20              |            |            |
|            | Eosinophil |                 | 20         |            |
|            | Neutrophil |                 | 1          | 19         |
|            |            | Basophil        | Eosinophil | Neutrophil |
|            |            | Predicted Class |            |            |

**Fig. S2.** The confusion matrix for the multi-wavelength SVM model.

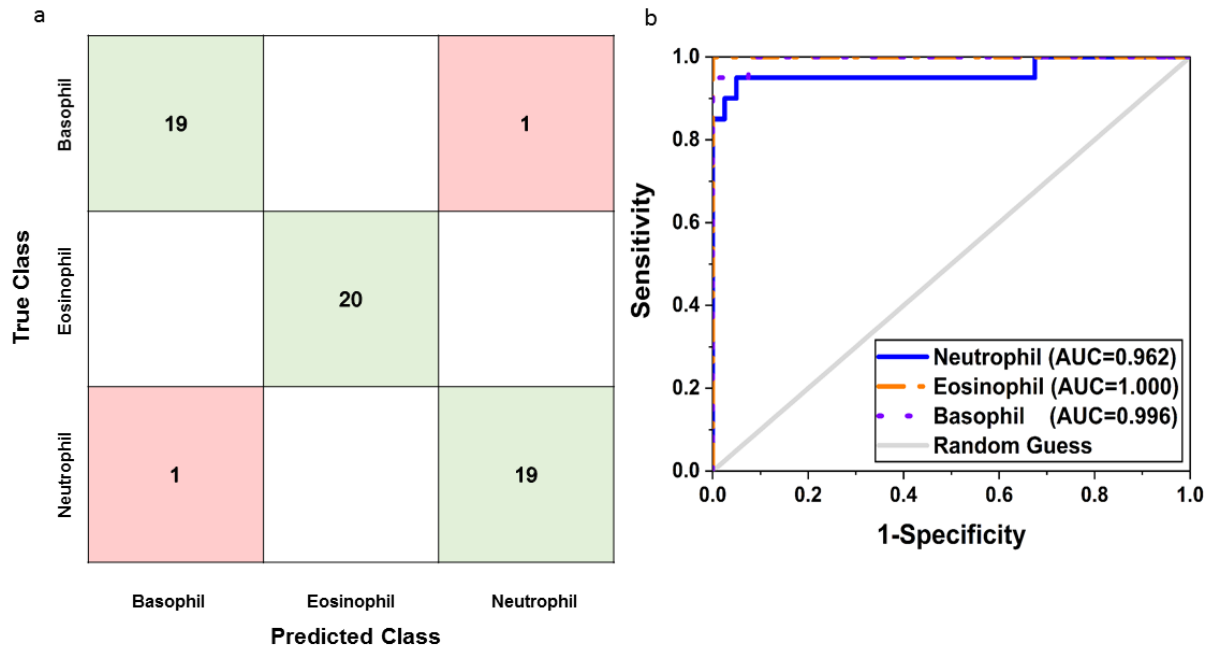

**Fig. S3.** The confusion matrix (a) and the ROC curves (b) for the single-wavelength SVM model.

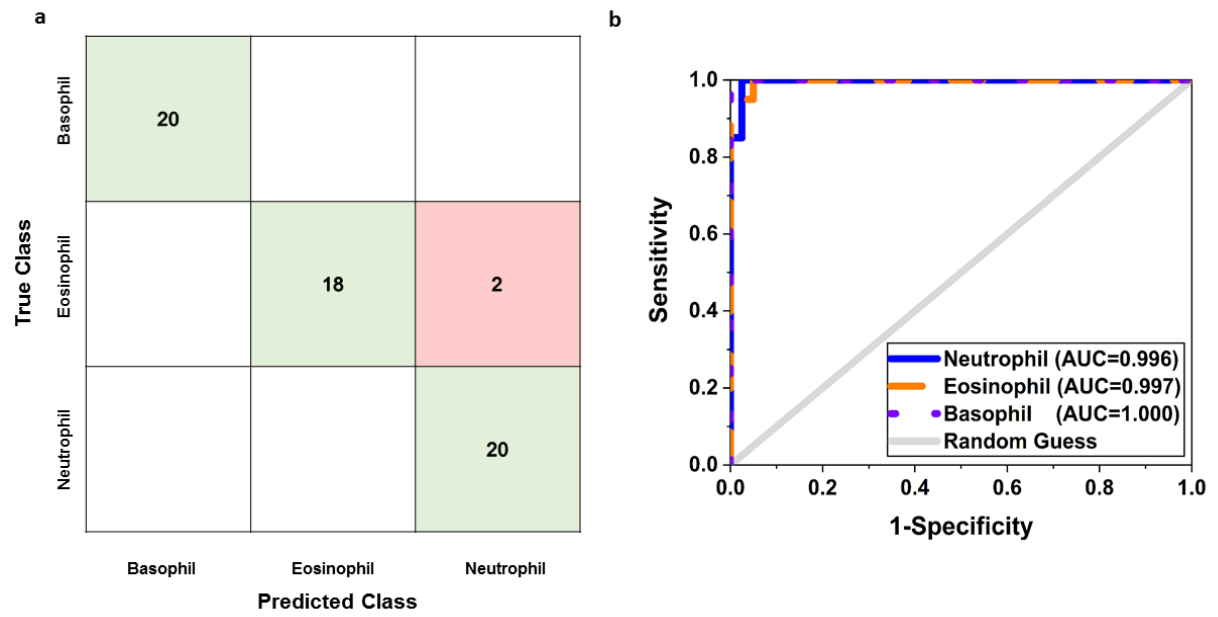

**Fig. S4.** The confusion matrix (a) and the ROC curves (b) for the SVM model based on the bright-field images of stained granulocytes.

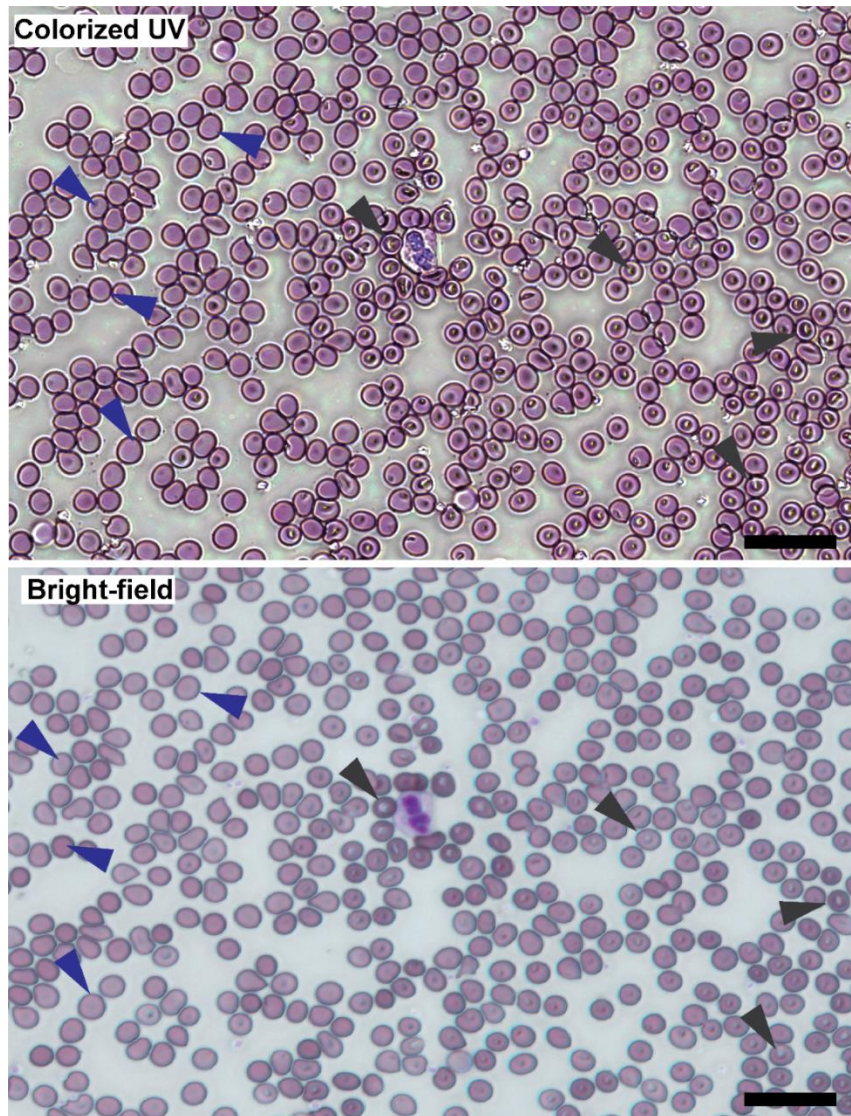

**Fig. S5.** Example UV colorized and bright-field images of the transition region from the monolayer to the feathered region. Here some RBC lose the typical biconcave RBC shape towards the end of this monolayer region of the smear. This is a common issue with blood smears which can result in misdiagnosis and confusion with other conditions, most typically spherocytosis (1). This issue can be mitigated by ensuring that imaging is performed within the central region of the monolayer area where RBCs maintain their natural shape. The figure shows RBCs with (gray arrowheads) and without (blue arrowheads) the biconcave shape. The scale bars are 30 $\mu$ m.

**Table S1.** The extracted features for multi- and single-wavelength model training

| <b>Feature</b>          | <b>Description</b>                                                                                                                                                                                                                                                                                                                   |
|-------------------------|--------------------------------------------------------------------------------------------------------------------------------------------------------------------------------------------------------------------------------------------------------------------------------------------------------------------------------------|
| <b>Morphological</b>    |                                                                                                                                                                                                                                                                                                                                      |
| Area                    | Area contained by cell contour                                                                                                                                                                                                                                                                                                       |
| Perimeter               | Cell contour perimeter                                                                                                                                                                                                                                                                                                               |
| Eccentricity            | The ratio of the distance between the foci of the ellipse and its major axis length. An ellipse whose eccentricity is 0 is a circle, while an ellipse whose eccentricity is 1 is a line segment.                                                                                                                                     |
| Circularity             | Calculated by $4\pi \times (\text{cell Area}) / \text{perimeter}^2$ . Circularity of a circle is 1.                                                                                                                                                                                                                                  |
| Major/Minor axis length | Length of the major/minor axis of the ellipse that has the same normalized second central moments as the cell contour                                                                                                                                                                                                                |
| Extent                  | Ratio of pixels in the cell contour to pixels in the total bounding box.                                                                                                                                                                                                                                                             |
| Solidity                | Ratio of contour area to its convex hull area                                                                                                                                                                                                                                                                                        |
| Second Momentum         | Euclidian distance between geometric centroid and each pixel averaged over the whole region.                                                                                                                                                                                                                                         |
| <b>Statistical</b>      |                                                                                                                                                                                                                                                                                                                                      |
| Mean                    | Sum of pixel values over the total number of pixels in the region.                                                                                                                                                                                                                                                                   |
| Skewness                | Skewness is a measure of the asymmetry of the data around the sample mean. If skewness is negative, the data spreads out more to the left of the mean than to the right. If skewness is positive, the data spreads out more to the right. The skewness of the normal distribution (or any perfectly symmetric distribution) is zero. |
| Kurtosis                | Kurtosis is a measure of how outlier-prone a distribution is. The kurtosis of the normal distribution is 3. Distributions that are more outlier-prone than the normal distribution have kurtosis greater than 3; distributions that are less outlier-prone have kurtosis less than 3.                                                |
| Entropy                 | Entropy is a statistical measure of randomness that can be used to characterize the texture of the input image. Defined as sum of the normalized histogram counts times their log.                                                                                                                                                   |
| Standard deviation      | Square root of the difference between each pixel value and average pixel values squared over the number of pixels minus one                                                                                                                                                                                                          |
| <b>GLCM</b>             |                                                                                                                                                                                                                                                                                                                                      |
| Contrast                | Intensity contrast between a pixel and its neighbor based on GLCM of the image.                                                                                                                                                                                                                                                      |

|              |                                                                                                                                                              |
|--------------|--------------------------------------------------------------------------------------------------------------------------------------------------------------|
| Correlation  | Measure of how correlated a pixel is to its neighbor over the whole image. Correlation is 1 or -1 for a perfectly positively or negatively correlated image. |
| Energy       | The sum of squared elements in the GLCM of the image. Energy is 1 for a constant image.                                                                      |
| Homogeneity  | Measures the closeness of the distribution of elements in the GLCM to the GLCM diagonal. Homogeneity is 1 for an image with diagonal GLCM.                   |
| <b>Mass</b>  |                                                                                                                                                              |
| Protein      | Average protein mass (in fg) calculated based on the description in Methods section.                                                                         |
| Nucleic acid | Average nucleic acid mass (in fg) calculated based on the description in Methods section.                                                                    |



## SI References

1. J. Dacie, *Dacie and Lewis practical haematology* (2006) (September 24, 2019).
